# Supplementary material for: Growth of Anodic Layers on 304L Stainless Steel Using Fluoride Free Electrolytes and Their Electrochemical Behavior in Chloride Solution
Source: MDPI journal article supplement (doi:10.3390/ma15051892), 2022-03-03
Supplement: s1 [file s1]

*Supplementary Material*

## **Growth Of Anodic Layers On 304L Stainless Steel Using Fluoride Free Electrolytes And Their Electrochemical Behavior In Chloride Solution**

**Laura Patricia Domínguez-Jaimes <sup>1</sup>, María A. Arenas <sup>2</sup>, Ana Conde <sup>2</sup>, B. Escobar <sup>3</sup>, Anabel Álvarez-Méndez<sup>1</sup> and Juan Manuel Hernández-López <sup>1,\*</sup>**

<sup>1</sup> Universidad Autónoma de Nuevo León, Facultad de Ciencias Químicas, Ciudad Universitaria, Av. Universidad s/n. C. P. 66455, Nuevo León, México.

<sup>2</sup> Department of Surface Engineering Corrosion and Durability, National Center for Metallurgical Research, CENIM-CSIC, Avda. Gregorio del Amo, 8, 28040 Madrid, Spain.

<sup>3</sup> CONACYT, Centro de Investigación Científica de Yucatán, Mérida, Yucatán, 97302, México.

\* Correspondence: [juan.hernandezlz@uanl.edu.mx](mailto:juan.hernandezlz@uanl.edu.mx); Tel.: + 52-1-81-83294000 ext. 6349

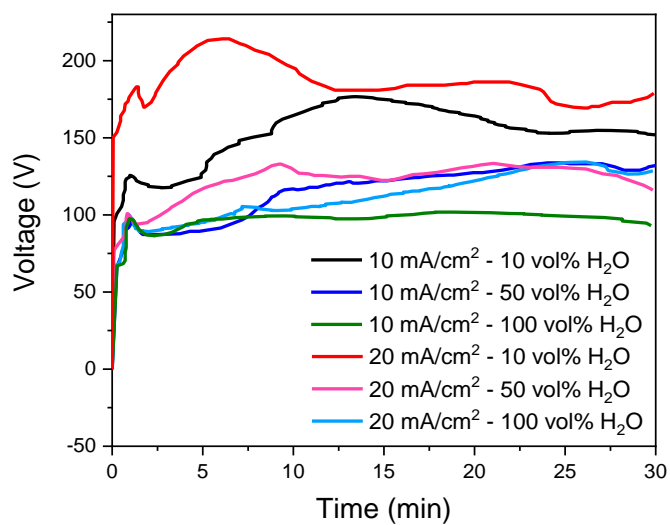

**Figure S1.** Voltage-time curves of the anodic layers grown in glycerol electrolyte containing 0.3 M NaAlO<sub>2</sub> and different H<sub>2</sub>O concentrations (10-50-100 vol%) for 30 min at 10 and 20 mA/cm<sup>2</sup>.

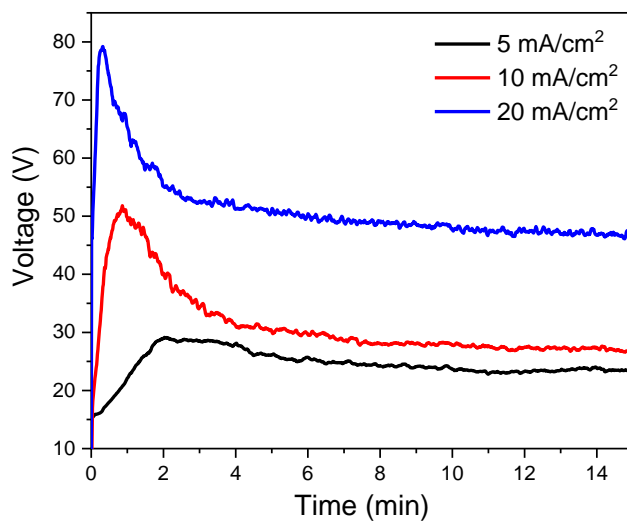

**Figure S2.** Voltage-time curves of the anodic layers grown in glycerol electrolyte containing 0.1 M Na<sub>2</sub>SiO<sub>3</sub> and 2.5 vol% H<sub>2</sub>O for 15 min at 5-10-20 mA/cm<sup>2</sup>.

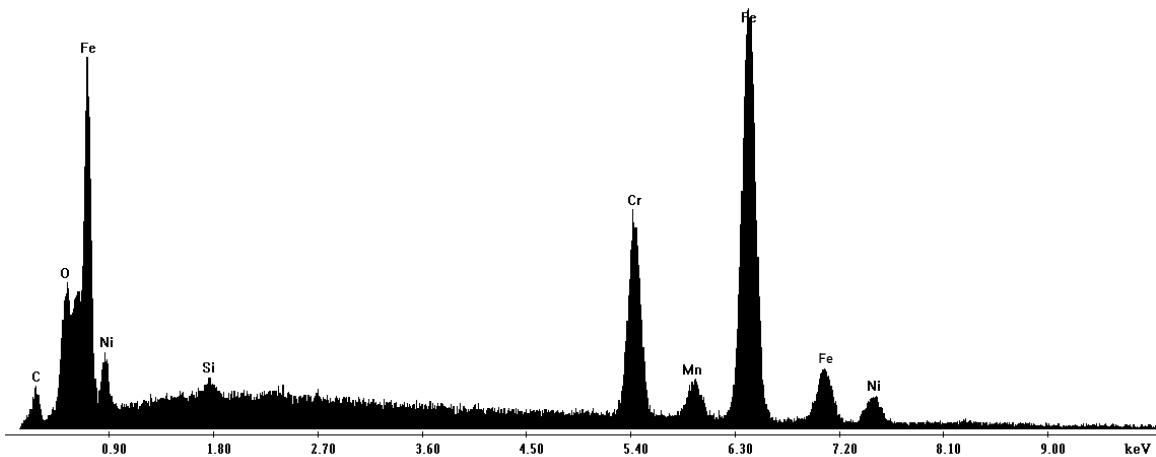

**Figure S3.** EDS diagram of the anodic layers grown in glycerol, 0.1 M  $\text{Na}_2\text{SiO}_3$  and 2.5 vol%  $\text{H}_2\text{O}$  for 15 min at 20  $\text{mA}/\text{cm}^2$ .

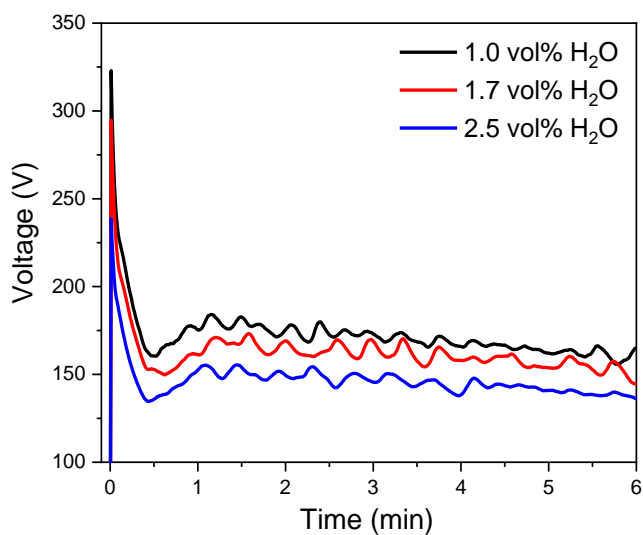

**Figure S4.** Voltage-time curves of the anodic layers grown in glycerol electrolyte containing 0.05 M  $\text{Na}_2\text{SiO}_3$  and different  $\text{H}_2\text{O}$  concentration (1.0-1.7-2.5 vol%) for 6 min at 20  $\text{mA}/\text{cm}^2$ .

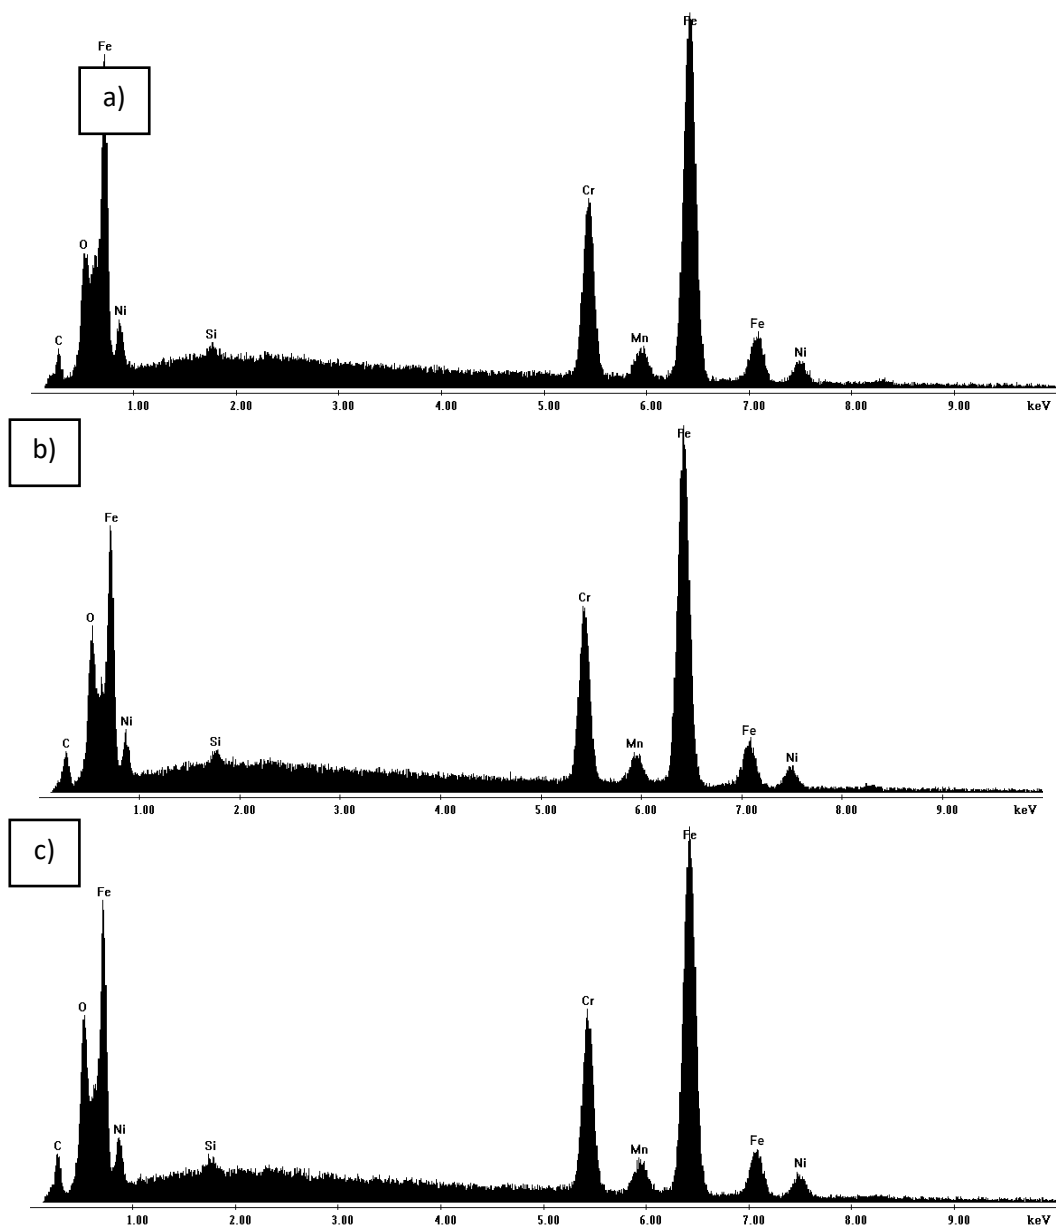

**Figure S5.** EDS diagrams of the anodic layers grown in a glycerol, 0.05 M Na<sub>2</sub>SiO<sub>3</sub> with H<sub>2</sub>O concentration of (a) 1.0, (b) 1.7, (c) 2.5 vol% for 6 min at 20 mA/cm<sup>2</sup>.
